# Supplementary material for: Phlorotannins from Undaria pinnatifida Sporophyll: Extraction, Antioxidant, and Anti-Inflammatory Activities
Source: MDPI journal article supplement (doi:10.3390/md17080434), 2019-07-24
Supplement: s1 [file s1]

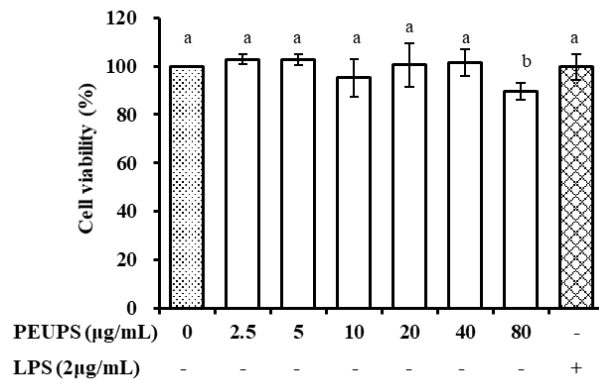

Figure S1. Effects of PEUPS on cell viability in RAW 264.7 cells. Cells ( $4 \times 10^5$  cells/mL) were incubated for 24 h with the indicated concentrations (2.5, 5, 10, 20, 40, 80  $\mu\text{g/mL}$ ) of PEUPS and 2  $\mu\text{g/mL}$  of LPS. The cell viability assay was performed using MTT assay. Values are means  $\pm$  SE ( $n = 3$ ). Bars not sharing a common letter are significantly different ( $p < 0.05$ ) from each other.

(a)

Spectrum from QDC-NEG.wiff (sample 1) - Sample002, Experiment 2, -TOF MS<sup>2</sup> (50 - 2000) from 2.961 min  
Precursor: 125.0 Da

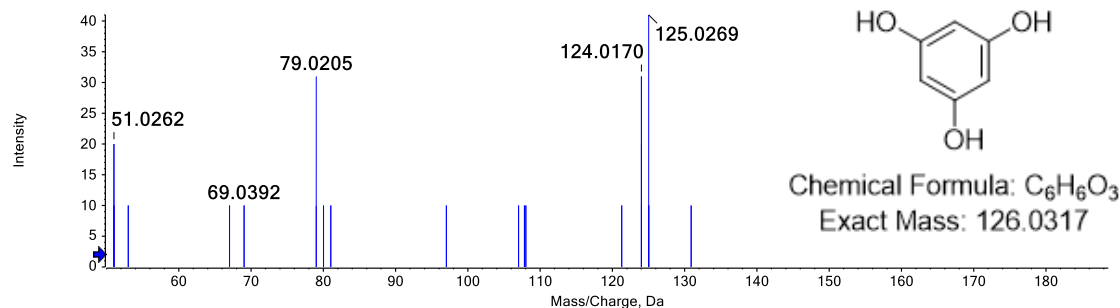

(b)

Spectrum from QDC-NEG.wiff (sample 1) - Sample002, Experiment 2, -TOF MS<sup>2</sup> (50 - 2000) from 5.420 min  
Precursor: 137.0 Da

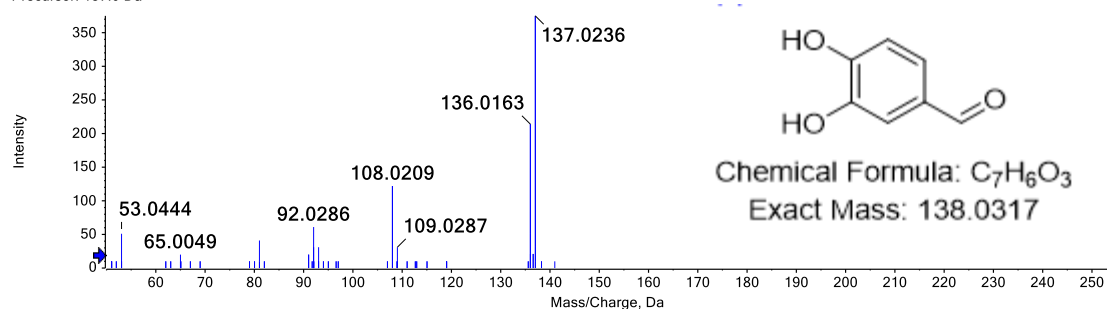

(c)

Spectrum from QDC-NEG.wiff (sample 1) - Sample002, Experiment 3, -TOF MS<sup>2</sup> (50 - 2000) from 5.561 min  
Precursor: 163.0 Da

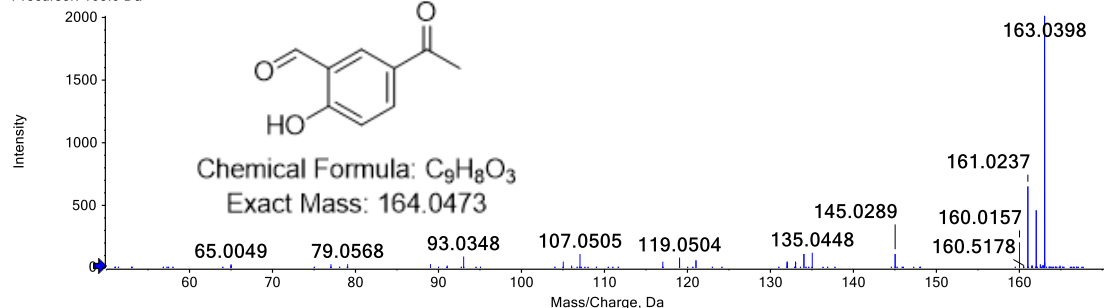

(d)

Spectrum from QDC-NEG.wiff (sample 1) - Sample002, Experiment 2, -TOF MS<sup>2</sup> (50 - 2000) from 5.715 min  
Precursor: 109.0 Da

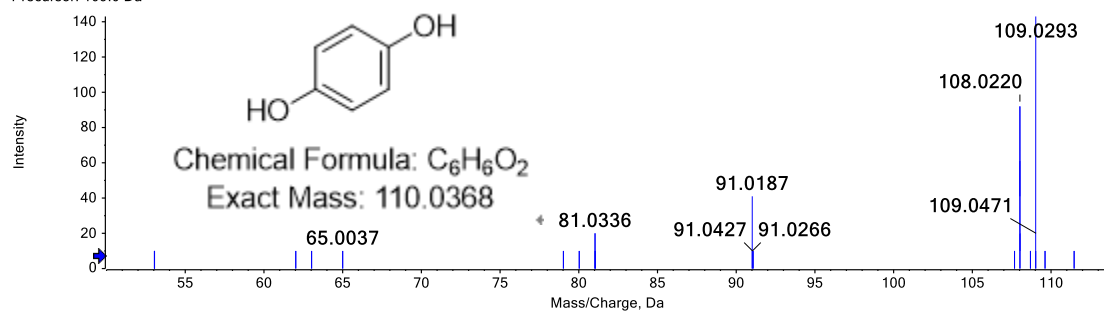

(e)

Spectrum from QDC-NEG.wiff (sample 1) - Sample002, Experiment 3, -TOF MS<sup>2</sup> (50 - 2000) from 6.594 min  
Precursor: 151.0 Da

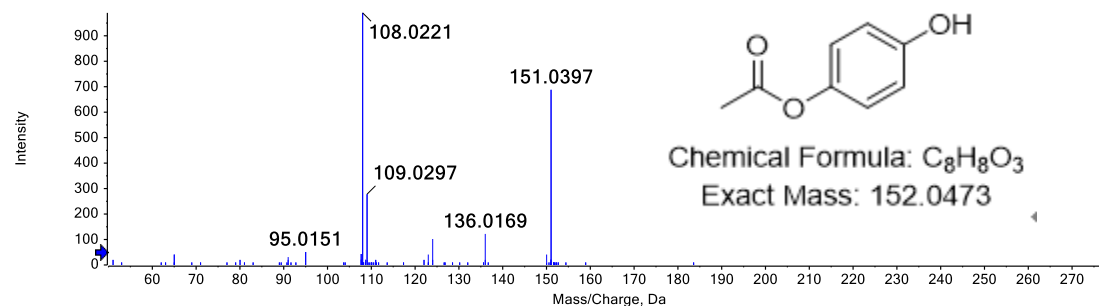

(f)

Spectrum from QDC-NEG.wiff (sample 1) - Sample002, Experiment 2, -TOF MS<sup>2</sup> (50 - 2000) from 7.914 min  
Precursor: 121.0 Da

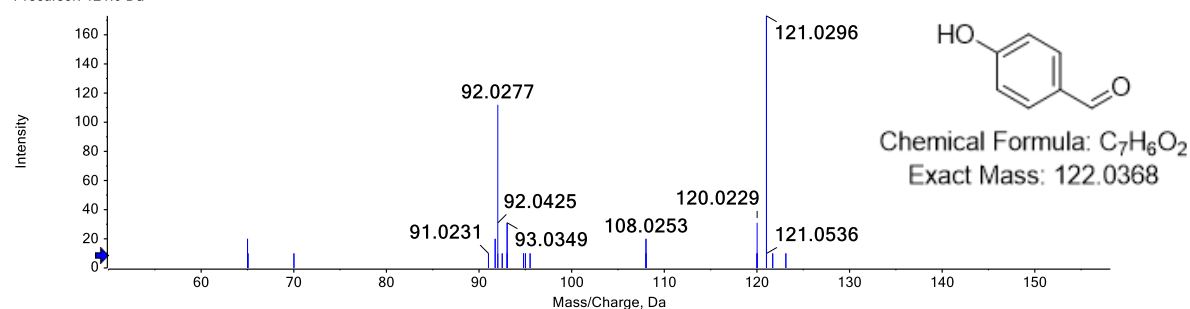

(g)

Spectrum from QDC-NEG.wiff (sample 1) - Sample002, Experiment 2, -TOF MS<sup>2</sup> (50 - 2000) from 8.852 min  
Precursor: 151.0 Da

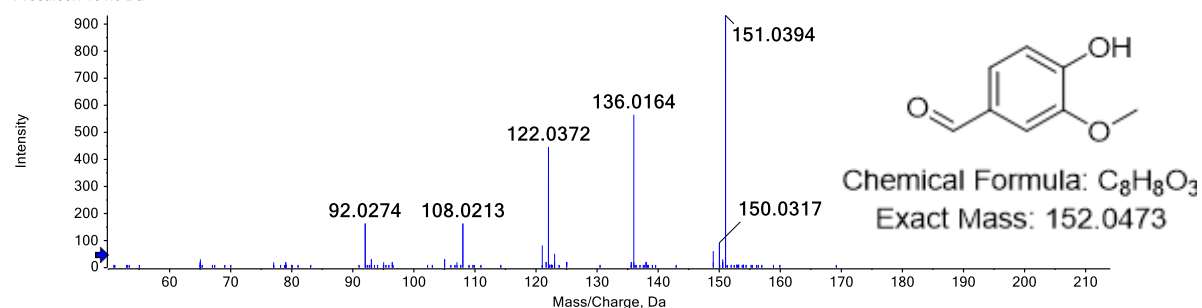

(h)

Spectrum from QDC-NEG.wiff (sample 1) - Sample002, Experiment 2, -TOF MS<sup>2</sup> (50 - 2000) from 10.070 min  
Precursor: 177.1 Da

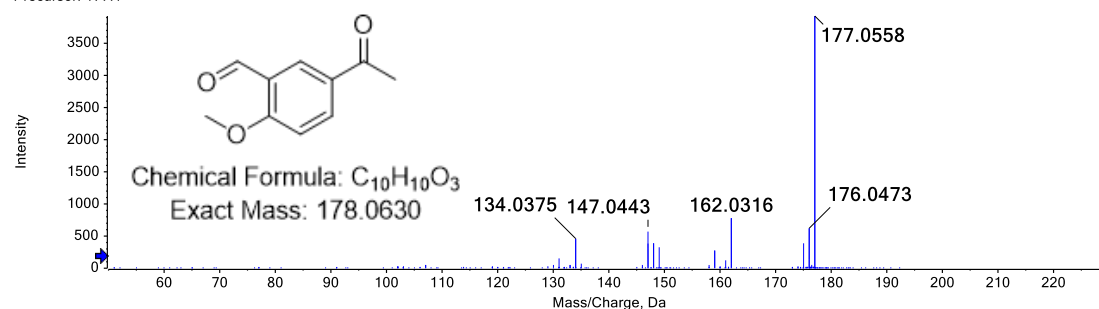

(i)

Spectrum from QDC-NEG.wiff (sample 1) - Sample002, Experiment 3, -TOF MS<sup>2</sup> (50 - 2000) from 10.744 min  
Precursor: 209.0 Da

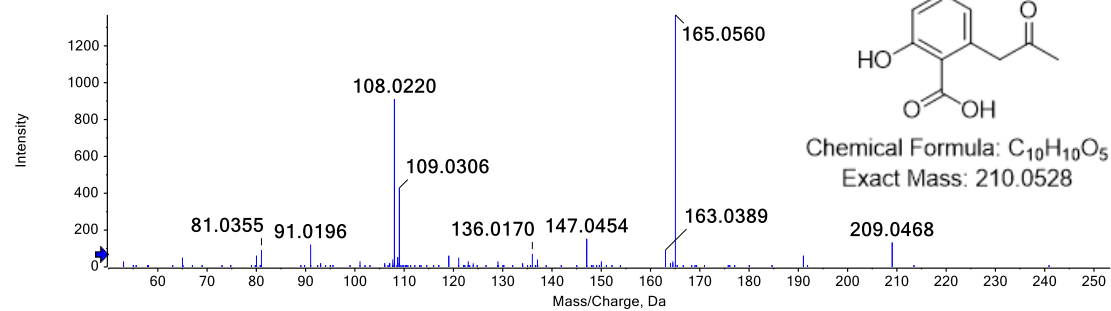

Figure S2. Nine polyphenolic compounds in extracted PEUPS based on the optimal condition. (a) 3,5-dihydroxyphenol; (b) 3,4-dihydroxybenzaldehyde; (c) 5-acetoxy-2-hydroxybenzaldehyde; (d) hydroquinone; (e) hydroquinone monoacetate; (f) hydroquinone monoacetate; (g) C<sub>8</sub>H<sub>8</sub>O<sub>3</sub>; (h) 1-(3-methoxy-4-hydroxyphenyl) ethenone; (i) 4-methoxy-phenol
